# Supplementary material for: Pharmacogenomics of clinical response to Natalizumab in multiple sclerosis: a genome-wide multi-centric association study
Source: PubMed Central journal article supplement (PMC11561017; doi:10.1007/s00415-024-12608-6), 2024-09-12

**a**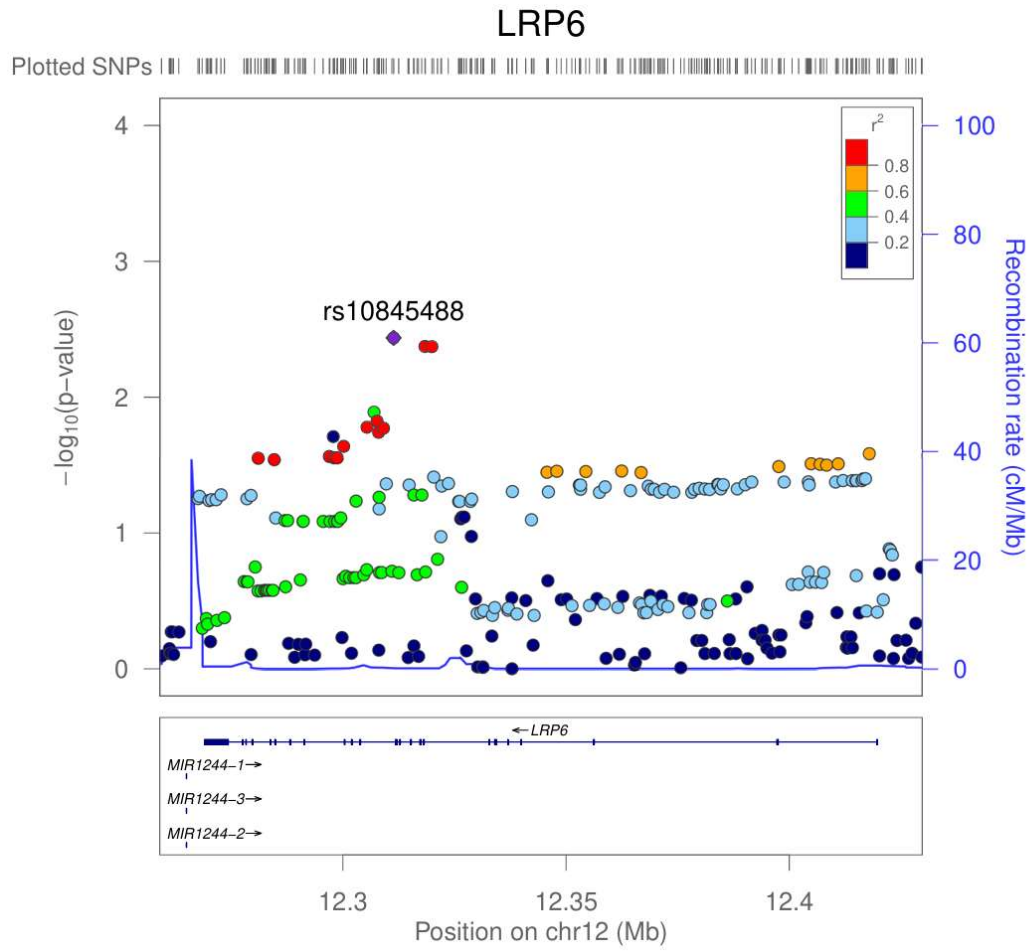**b**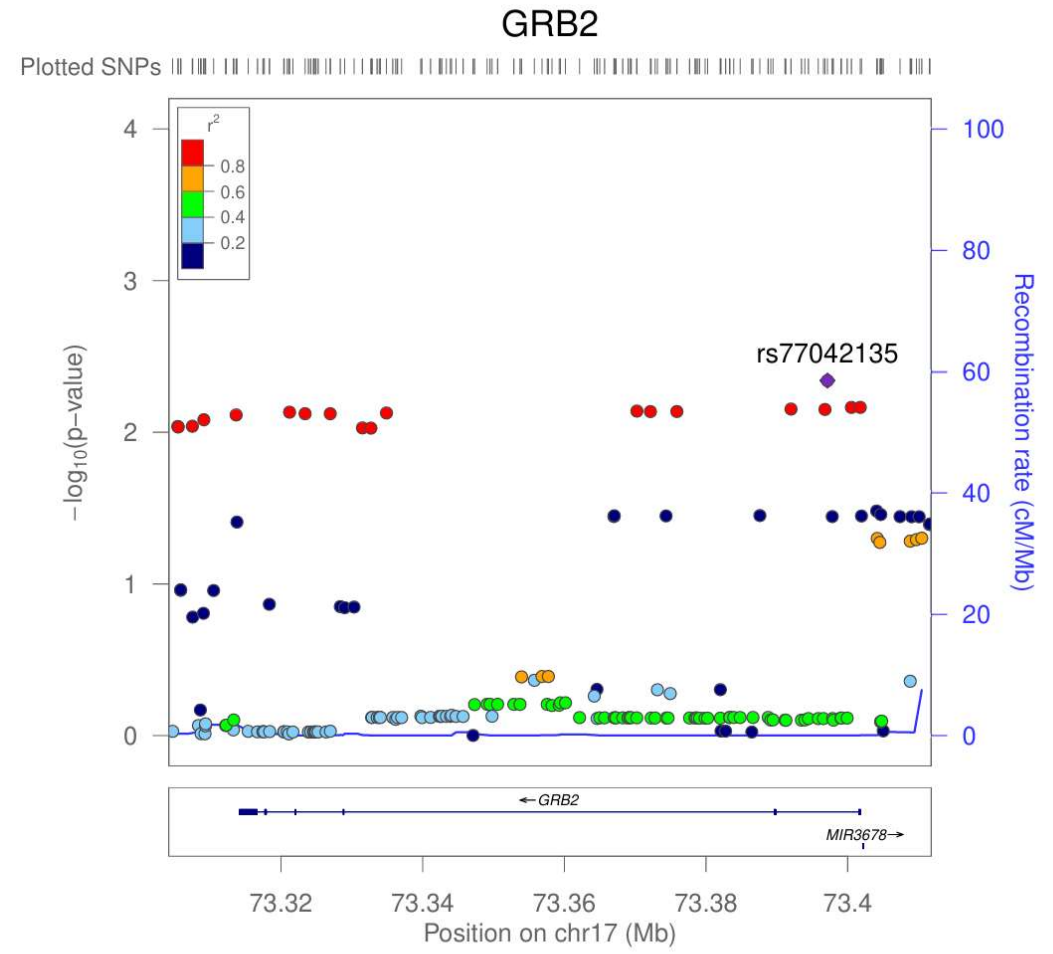

Supplement: 415_2024_12608_MOESM2_ESM.pdf [file 415_2024_12608_MOESM2_ESM.pdf]
